# Supplementary material for: Patient stratification reveals the molecular basis of disease co-occurrences
Source: bioRxiv or medRxiv preprint supplement (doi:10.1101/2021.07.22.21260979), 2025-08-13
Supplement: Supplementary file [file media-2.pdf]

| Disease                                  | Study     | Tissue            | Cases | Controls |
|------------------------------------------|-----------|-------------------|-------|----------|
| Adenomatous polyps                       | GSE76987  | Colon             | 10    | 20       |
| Alagille syndrome                        | GSE104873 | Liver             | 5     | 5        |
| Amyotrophic lateral sclerosis            | GSE67196  | Brain             | 36    | 17       |
| Asthma                                   | GSE85567  | Airway epithelium | 57    | 28       |
| Autism                                   | GSE67528  | Brain             | 17    | 8        |
| Bipolar disorder                         | GSE78936  | Brain             | 9     | 9        |
| Bipolar disorder                         | GSE78936  | Brain             | 7     | 6        |
| Bipolar disorder                         | GSE78936  | Brain             | 7     | 6        |
| Borrelia burgdorferi infection           | GSE85143  | Brain             | 6     | 3        |
| Breast cancer                            | GSE58135  | Breast            | 38    | 98       |
| Breast cancer                            | GSE69240  | Breast            | 18    | 10       |
| Cardiomyopathy                           | GSE71613  | Heart             | 4     | 4        |
| Chronic lymphocytic leukemia             | GSE66117  | Blood             | 41    | 3        |
| Chronic obstructive pulmonary disease    | GSE57148  | Lung              | 98    | 91       |
| Coeliac disease                          | GSE69549  | Intestine         | 13    | 10       |
| Colorectal cancer                        | GSE74369  | Colon             | 10    | 10       |
| Colorectal cancer                        | GSE77635  | Colon             | 9     | 9        |
| Colorectal cancer                        | GSE76987  | Colon             | 4     | 20       |
| Crohn's Disease                          | GSE67250  | Intestine         | 3     | 3        |
| Crohn's disease                          | GSE83687  | Colon             | 42    | 58       |
| Crohn's disease                          | GSE93624  | Ileum             | 194   | 35       |
| Downs syndrome                           | GSE79842  | Fibroblast        | 17    | 18       |
| Eosinophilic esophagitis                 | GSE58640  | Esophagus         | 9     | 6        |
| Facioscapulohumeral dystrophy            | GSE56787  | Muscle            | 15    | 8        |
| Familial Dysautonomia                    | GSE77513  | Brain             | 5     | 3        |
| Familial pulmonary arterial hypertension | GSE79613  | Brain             | 5     | 6        |
| Friedreich's ataxia                      | GSE104288 | Skin              | 18    | 17       |
| Glioblastoma                             | GSE59612  | Brain             | 74    | 17       |
| Glioblastoma                             | GSE79338  | Brain             | 11    | 3        |
| Human immunodeficiency virus infection   | GSE81198  | Intestine         | 58    | 26       |
| Huntington's disease                     | GSE64810  | Brain             | 20    | 49       |
| Huntington's disease                     | GSE79666  | Brain             | 7     | 7        |
| Huntington's disease                     | GSE95343  | Brain             | 3     | 3        |
| Huntington's disease                     | GSE97100  | Brain             | 8     | 4        |
| Hyperplastic polyps                      | GSE76987  | Colon             | 10    | 20       |
| Idiopathic pulmonary fibrosis            | GSE92592  | Lung              | 18    | 19       |
| Ischemia                                 | GSE59100  | Heart             | 4     | 4        |
| Kaposi's Sarcoma                         | GSE100684 | Lymphatic node    | 4     | 4        |
| Keratoconus                              | GSE112155 | Cornea            | 7     | 8        |
| Liver cancer                             | GSE63420  | Liver             | 7     | 7        |
| Liver cancer                             | GSE63863  | Liver             | 12    | 12       |
| Liver cancer                             | GSE65485  | Liver             | 47    | 4        |
| Liver cancer                             | GSE81550  | Liver             | 3     | 3        |
| Liver cancer                             | GSE97214  | Liver             | 9     | 9        |
| Liver cancer                             | GSE70089  | Liver             | 3     | 6        |
| Liver cancer                             | GSE94660  | Liver             | 21    | 21       |
| Liver cancer                             | GSE84073  | Liver             | 9     | 4        |

|                               |           |                   |     |     |
|-------------------------------|-----------|-------------------|-----|-----|
| Lung cancer                   | GSE70089  | Lung              | 3   | 6   |
| Lung cancer                   | GSE81089  | Lung              | 199 | 19  |
| Lymphocytic colitis           | GSE65107  | Colon             | 4   | 4   |
| Multiple sclerosis            | GSE100297 | Brain             | 4   | 5   |
| Muscular dystrophy            | GSE103270 | Skin              | 13  | 6   |
| Myotonic dystrophy            | GSE67812  | Heart             | 3   | 3   |
| Parkinson's disease           | GSE62642  | Brain             | 6   | 8   |
| Parkinson's disease           | GSE68719  | Brain             | 29  | 44  |
| Parkinson's disease           | GSE90514  | Fibroblast        | 4   | 4   |
| Posttraumatic stress disorder | GSE64813  | Blood             | 47  | 47  |
| Posttraumatic stress disorder | GSE83601  | Blood             | 5   | 5   |
| Prostate cancer               | GSE82071  | Prostate          | 10  | 10  |
| Prostate cancer               | GSE85606  | Prostate          | 3   | 3   |
| Rheumatoid arthritis          | GSE90081  | Blood             | 5   | 9   |
| Schizophrenia                 | GSE63738  | Brain             | 6   | 6   |
| Schizophrenia                 | GSE78936  | Brain             | 10  | 9   |
| Schizophrenia                 | GSE78936  | Brain             | 6   | 6   |
| Schizophrenia                 | GSE78936  | Brain             | 5   | 6   |
| Schizophrenia                 | GSE92874  | Brain             | 3   | 4   |
| Sessile serrated polyposis    | GSE76987  | Colon             | 3   | 20  |
| Smoker                        | GSE47718  | Airway epithelium | 7   | 10  |
| Systemic lupus erythematosus  | GSE80183  | Blood             | 12  | 4   |
| Thyroid cancer papillary      | GSE64912  | Thyroid           | 18  | 4   |
| Ulcer                         | GSE57945  | Ileon             | 67  | 129 |
| Ulcerative colitis            | GSE83687  | Colon             | 32  | 58  |
